# Education Directory

## CALIFORNIA

Bakersfield

### **CCRN Review Course**

*Date:* March 5-6, 2020. *Place:* Memorial Hospital. *Address:* 420 34th St, Bakersfield, CA 93301. *Keynote Speaker:* Karen Carroll. *Sponsor:* Central Valley Chapter of AACN. *Contact:* Karen Carroll. *Phone:* 760-519-9108. *Email:* certifiedrn1234@gmail.com. *Fee:* \$250; \$225 for Dignity and Adventist employees.

Bakersfield

### **PCCN Review Course 2-Day**

*Date:* March 12-13, 2020. *Place:* Adventist Health. *Address:* 1524 27th St, Bakersfield, CA 93301. *Keynote Speaker:* Karen Carroll. *Sponsor:* Central Valley Chapter of AACN. *Contact:* Karen Carroll. *Phone:* 760-519-9108. *Email:* certifiedrn1234@gmail.com. *Fee:* \$250; \$225 for Dignity and Adventist employees.

Granada Hills

### **SFV-AACN Acute Care Spring Symposium**

*Date:* March 11-12, 2020. *Place:* The Odyssey. *Address:* 15600 Odyssey Dr, Granada Hill, CA 91344. *Keynote Speaker:* TBA. *Sponsor:* San Fernando Valley Chapter of AACN. *Contact:* Kathe Rich. *Phone:* 661-644-4549. *Email:* katherich@gmail.com. *Fee:* Early registration for members, \$105; nonmembers, \$115; late registration for members, \$130; nonmembers, \$140.

Mission Viejo

### **CCRN Review Course-by Karen Carroll**

*Date:* April 2 and 7, 2020. *Place:* Mission Hospital, St Joseph Health. *Address:* 26726 Crown Valley Parkway, Mission Viejo, CA 92691. *Keynote Speaker:* Karen Carroll. *Sponsor:* Inland Empire Chapter of AACN. *Contact:* Karen Carroll. *Phone:* 760-519-9108. *Email:* certifiedrn1234@gmail.com. *Fee:* \$250; \$225 for Providence St Joseph employees.

Sacramento

### **CCRN/PCCN Review**

*Date:* March 18-19, 2020. *Place:* University of California Davis, Medical Center. *Address:* Sacramento, CA. *Keynote Speaker:* Carol Rauen. *Sponsor:* Sacramento Area Chapter of AACN. *Contact:* Jodi Coltes Warfield. *Phone:* 916-402-5843. *Email:* sacaacn@gmail.com. *Fee:* \$200 member; \$250 nonmember.

Sacramento

### **Certification Celebration Dinner**

*Date:* March 21, 2020. *Place:* Old Sacramento Delta Queen. *Keynote Speaker:* No key speaker. *Sponsor:* Sacramento Area Chapter of AACN. *Contact:* Jodi Coltes Warfield. *Phone:* 916-402-5843. *Email:* sacaacn@gmail.com. *Fee:* \$25 per person.

## FLORIDA

Gainesville

### **Swamped With Knowledge**

*Date:* April 18, 2020. *Place:* IFAS Straughn Development Center. *Address:* 2142 Shealy Dr, Gainesville, FL 32608. *Keynote Speakers:* Jodi Mullen, Charlotte Davis, Dr. Hassan Alnuaimat, Dr. Carrie Watson. *Sponsor:* North Central Florida Chapter of AACN. *Contact:* Dironada Strange. *Phone:* 352-256-4412. *Email:* ncfchapter.aacn@gmail.com. *Fee:* Before 4/3/2020: \$59 member; \$79 nonmember; \$39 students (no current RN license).

Gainesville

### **CCRN Review Course**

*Date:* June 6-7, 2020. *Place:* UF Health-South Tower. *Address:* 1515 SW Archer Rd, Gainesville, FL 32608. *Keynote Speaker:* Mary Ann "Cammie" Christie. *Sponsor:* North Central Florida Chapter of AACN. *Contact:* Dironada Strange. *Phone:* 352-256-4412. *Email:* ncfchapter.aacn@gmail.com. *Fee:* \$150 member; \$220 nonmember.

Gainesville

### **CCRN Review Course**

*Date:* November 14-15, 2020. *Place:* UF Health-South Tower. *Address:* 1515 SW Archer Rd, Gainesville, FL 32608. *Keynote Speaker:* Mary Ann "Cammie" Christie. *Sponsor:* North Central Florida Chapter of AACN. *Contact:* Dironada Strange. *Phone:* 352-256-4412. *Email:* ncfchapter.aacn@gmail.com. *Fee:* \$150 member; \$220 nonmember.

Plantation

### **45th Annual Spring Seminar**

*Date:* April 18, 2020. *Place:* Renaissance Hotel. *Address:* 1230 S Pine Island Rd, Plantation, FL 33324. *Keynote Speakers:* Megan Brunson, AACN President, Doug Houghton, Mary Bylone. *Sponsor:* Broward County Chapter of AACN. *Contact:* Bernice Goldson. *Phone:* 954-849-8629. *Email:* brg5454@gmail.com. *Fee:* \$100 members; \$125 nonmembers.

South Miami

### **MTI-Miami Teaching Institute**

*Date:* March 21, 2020. *Place:* South Miami Hospital, Victor E Clark Education Center. *Address:* 6200 SW 73rd St, South Miami, FL 33143. *Keynote Speaker:* Megan Brunson, AACN President. *Sponsor:* Greater Miami Area Chapter of AACN. *Contact:* Millicent Wynter. *Phone:* 305-905-2177. *Email:* wmydestini@att.net. *Fee:* \$110 member; \$130 nonmember; \$160 walk in; \$60 student.

*Continued*

## FLORIDA (Continued)

West Palm Beach

### **Paving Our Way to Unstoppable: Acute and Critical Care Nursing Symposium**

*Date:* May 14-15, 2020. *Place:* Hilton Palm Beach Airport Hotel. *Address:* 150 Australian Ave, West Palm Beach, FL 33406. *Keynote Speakers:* Megan Brunson, AACN President, Linda Littlejohns, Eddy Gutierrez, Rebecca Norton, Kathryn Keller. *Sponsor:* Palm Beach County Chapter of AACN. *Contact:* Ronela Arandela. *Phone:* 561-373-7867. *Email:* AACNPBC@gmail.com. *Fee:* Early bird before 3/31/2020: \$153 member; \$198 non-member; \$86 for 1 day.

## ILLINOIS

Hoffman Estates

### **2020 Midwest Conference**

*Date:* March 19-20, 2020. *Place:* The Stonegate Conference Center. *Address:* 2401 W Higgins Rd, Hoffman Estates, IL 60169. *Keynote Speakers:* Thursday: Megan Brunson, AACN President; Friday: Kevin O'Connor. *Sponsor:* Northwest Chicago Area Chapter of AACN. *Contact:* Cindy Ruiz. *Phone:* 847-721-9713. *Email:* cindylruiz@yahoo.com. *Fee:* \$150 for 1 day; \$275 for 2 days.

## LOUISIANA

Lafayette

### **CAB**

*Date:* April 15, 2020. *Place:* Petroleum Club of Lafayette. *Keynote Speakers:* Dr Dearman, Dr Sheth, Dillon Davis. *Sponsor:* Heart of Acadiana Chapter of AACN. *Contact:* Katie Doggett. *Phone:* 337-257-2001. *Email:* KDDoggett7@gmail.com. *Fee:* \$23 includes buffet.

## MAINE

Portland

### **Horizons 2020**

*Date:* March 31-April 2, 2020. *Place:* Portland, ME. *Keynote Speaker:* Megan Brunson, AACN President. *Sponsor:* Horizons Region 1 Chapter of AACN. *Contact:* Pat Rosier. *Phone:* 413-447-2593. *Email:* pkrosier58@gmail.com.

## OKLAHOMA

Norman

### **OKCAACN 4th Annual Spring Symposium**

*Date:* March 25, 2020. *Place:* Norman Regional Hospital, Floor 1, Education Center, Jimerson Auditorium. *Address:* 901 N Porter Ave, Norman, OK 73071. *Keynote Speakers:* Megan Brunson, AACN President, Shannon Boles, Susan Dresser, Julieanne Pitts, Holli Williams. *Sponsor:* Oklahoma City Area Chapter of AACN. *Contact:* Deron Dunnington. *Phone:* 405-990-7681. *Email:* d.dunnington@sbcglobal.net. *Fee:* Early bird \$60 until March 10th; \$75 after March 10th.

---

For *AJCC* Education Directory submission information  
phone (800) 809-2273, ext 532; or e-mail, [ajcc@aacn.org](mailto:ajcc@aacn.org).
